# Supplementary material for: Efficiently charting the space of mixed vacancy-ordered perovskites by machine-learning encoded atomic-site information
Source: Research Square preprint supplement (doi:10.21203/rs.3.rs-6076310/v1), 2025-03-26
Supplement: Supplementary file 1 [file c1a4fff4f09225f8733908e7.docx]

**Supplemental Materials**

**Efficiently charting the space of mixed vacancy-ordered perovskites by machine-learning encoded atomic-site information**

Fan Zhang1, Li Fu1, Weiwei Gao1*, Peihong Zhang2, Jijun Zhao3*

1. *Key Laboratory of Material Modification by Laser, Ion and Electron Beams (Dalian University of Technology), Ministry of Education, Dalian 116024, China*
2. *Department of Physics, State University of New York at Buffalo, Buffalo, New York 14260, USA*
3. *Guangdong Basic Research Center of Excellence for Structure and Fundamental Interactions of Matter, Guangdong Provincial Key Laboratory of Quantum Engineering and Quantum Materials, School of Physics, South China Normal University, Guangzhou 510006, China*


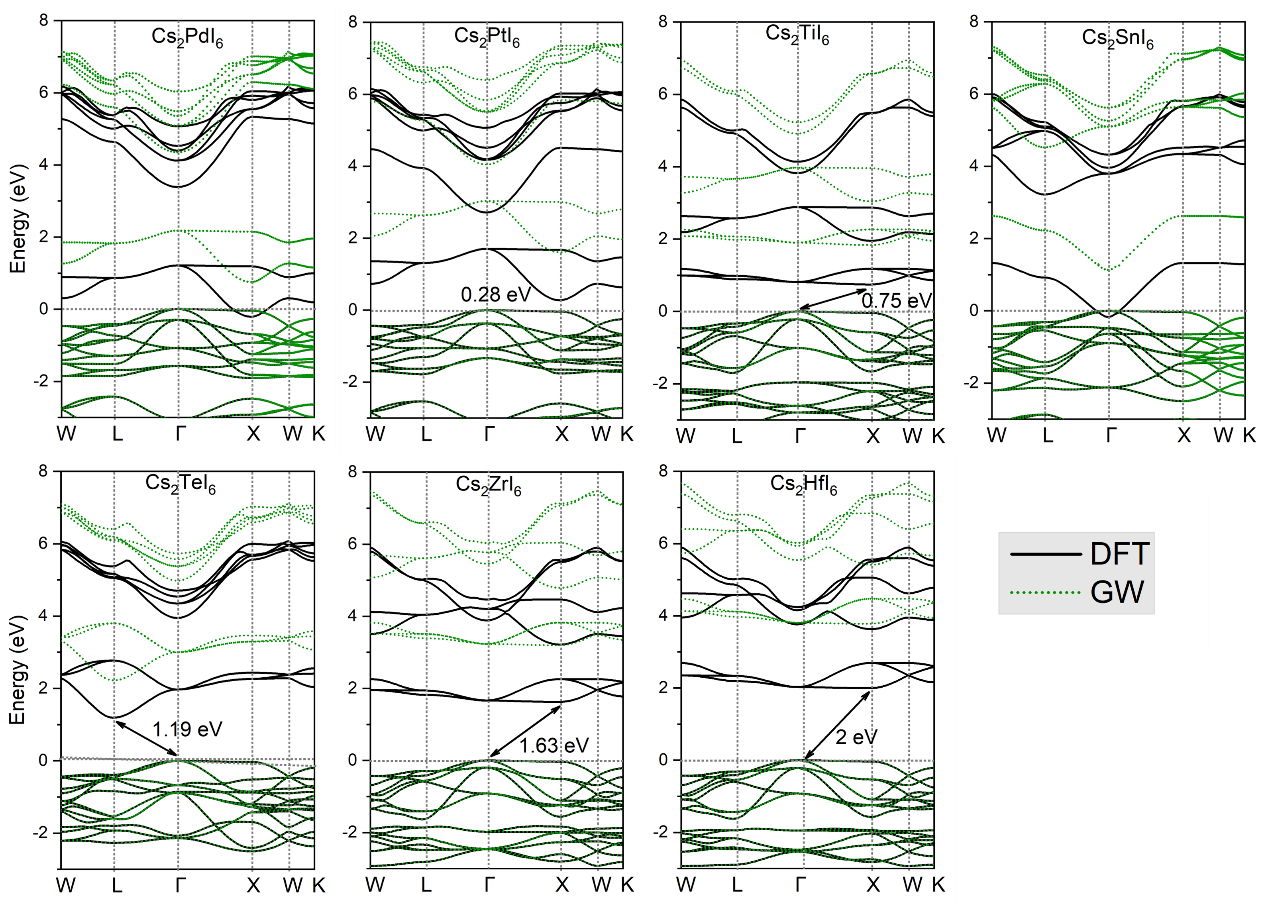


Fig. S1 DFT and GW band structure for Cs2MI6 (M = Pd, Pt, Ti, Sn, Te, Zr and Hf). Since the band structure of Cs2PdI6 and Cs2SnI6 within PBEsol functional are metallic, here the GW scissor shift are calculated within PBE functional.


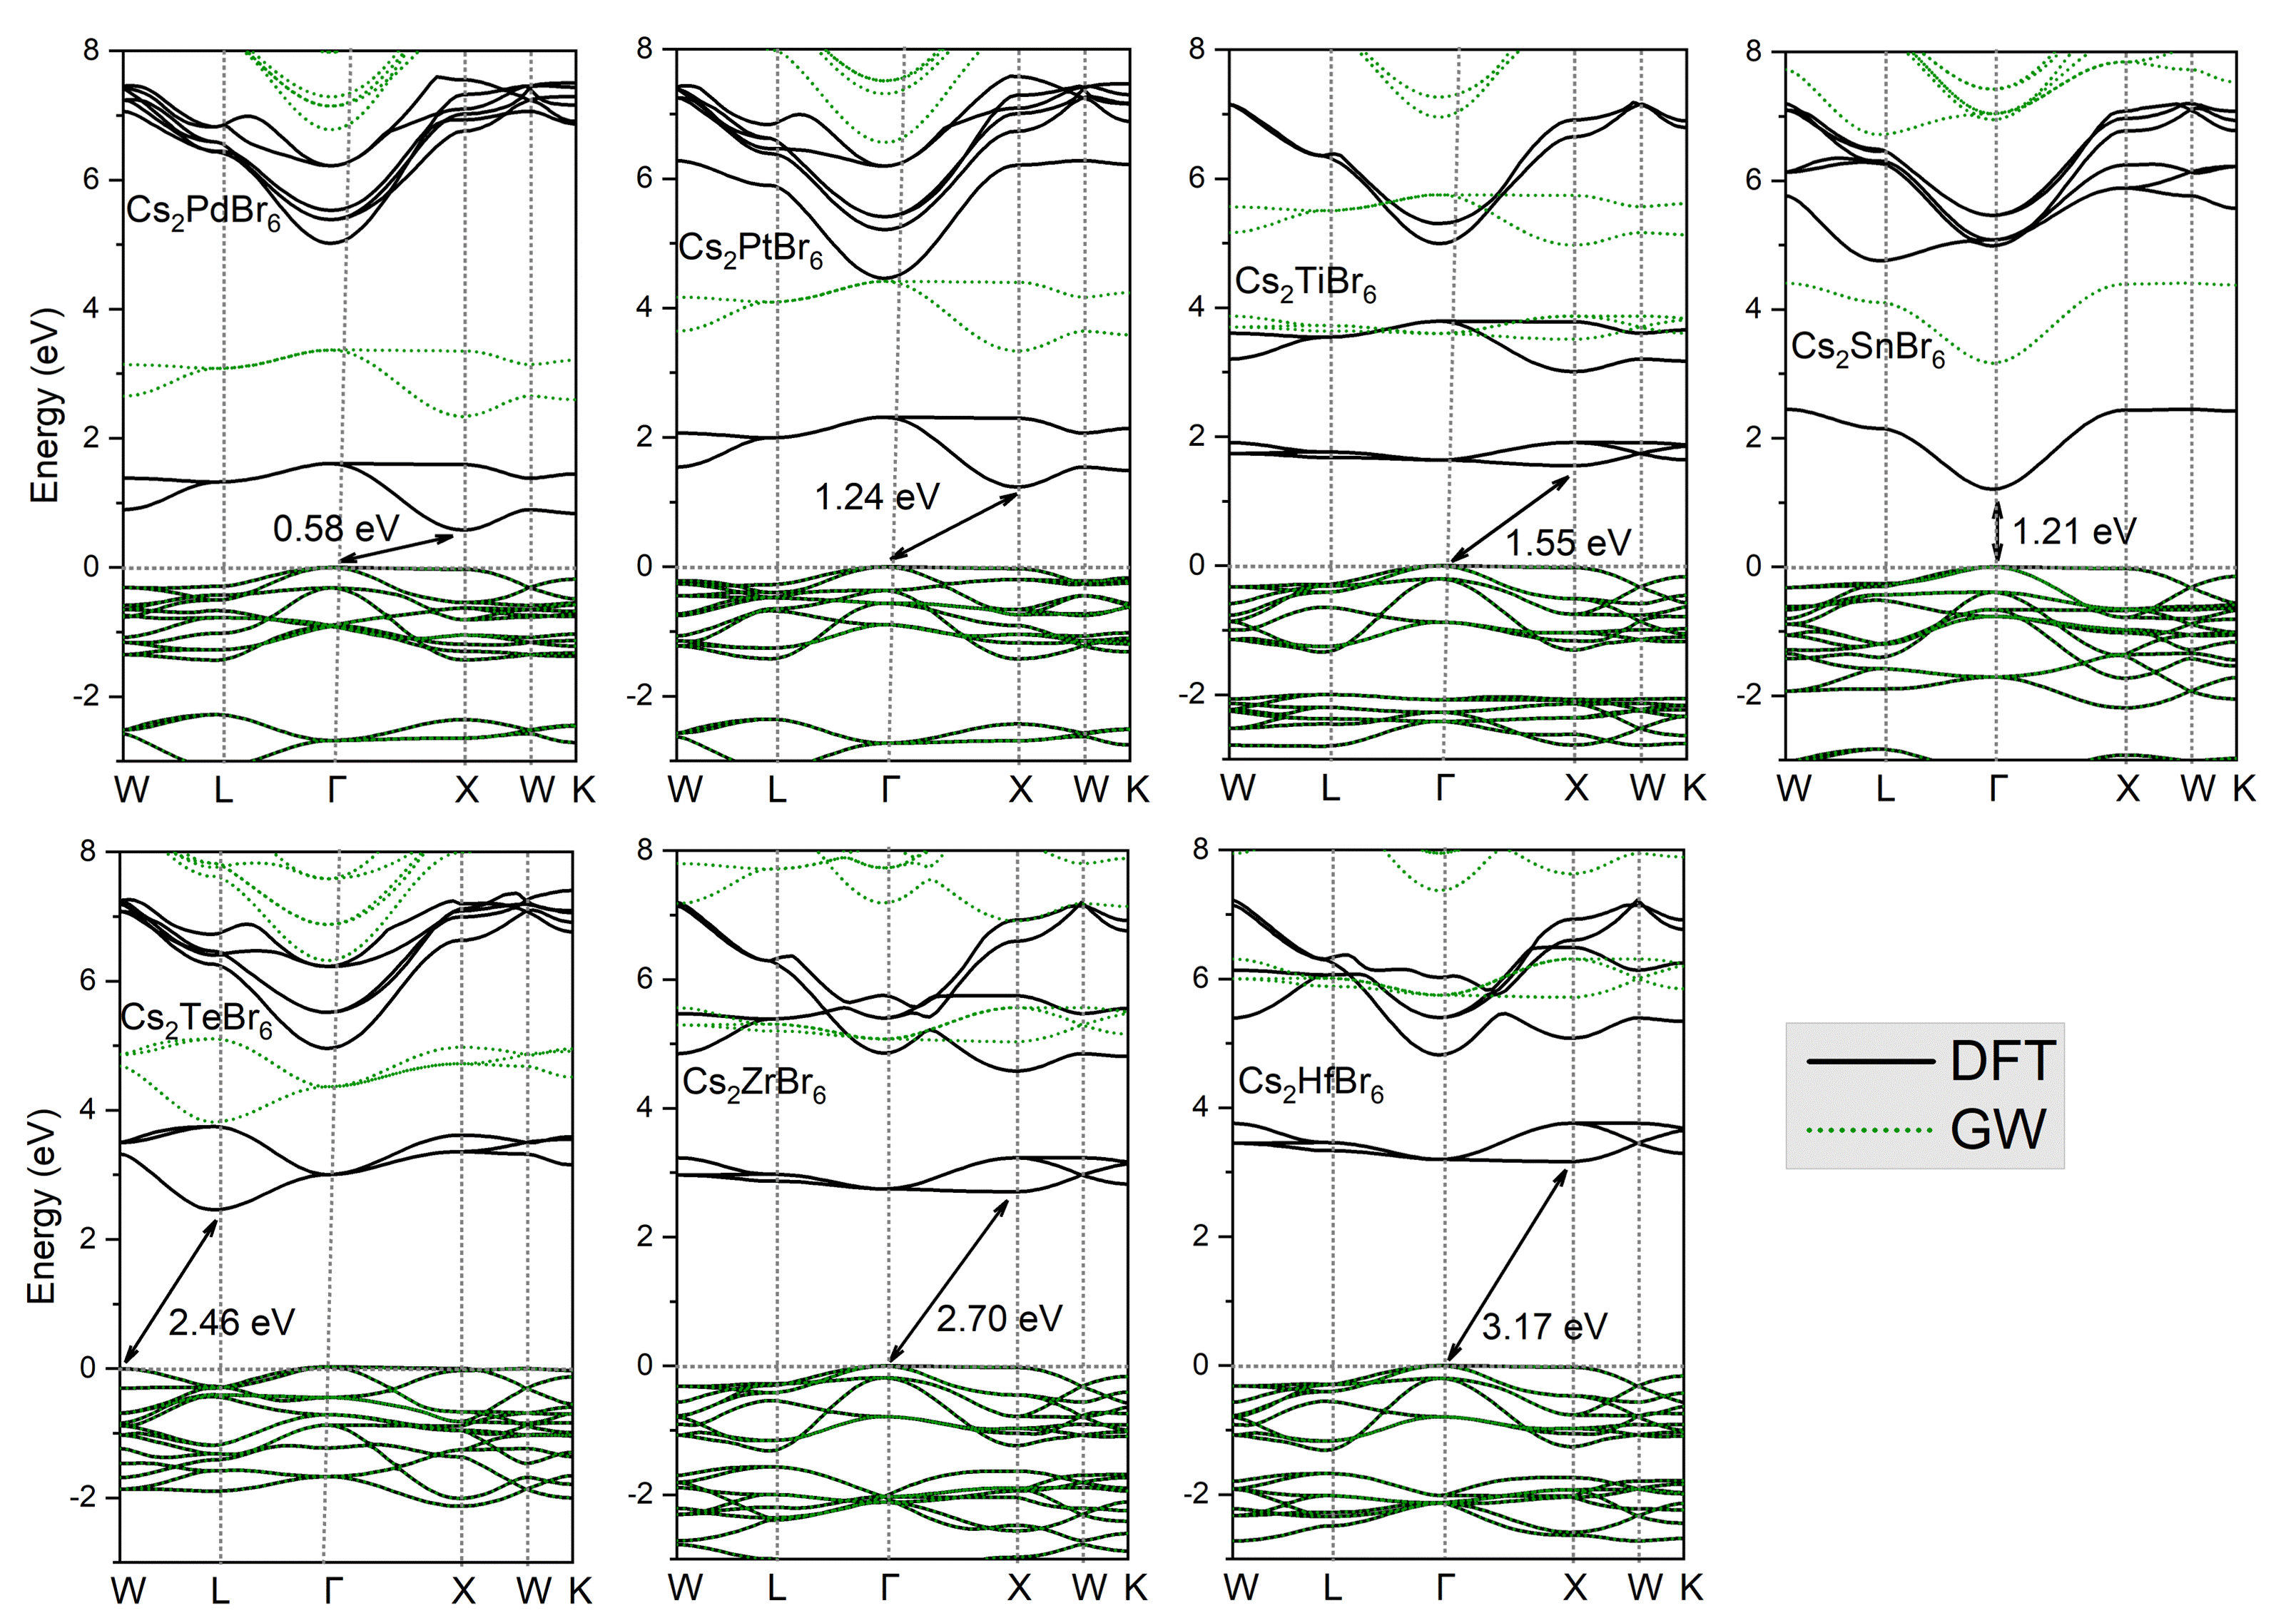


Fig. S2 DFT and GW band structure for Cs2MBr6 (M = Pd, Pt, Ti, Sn, Te, Zr and Hf).


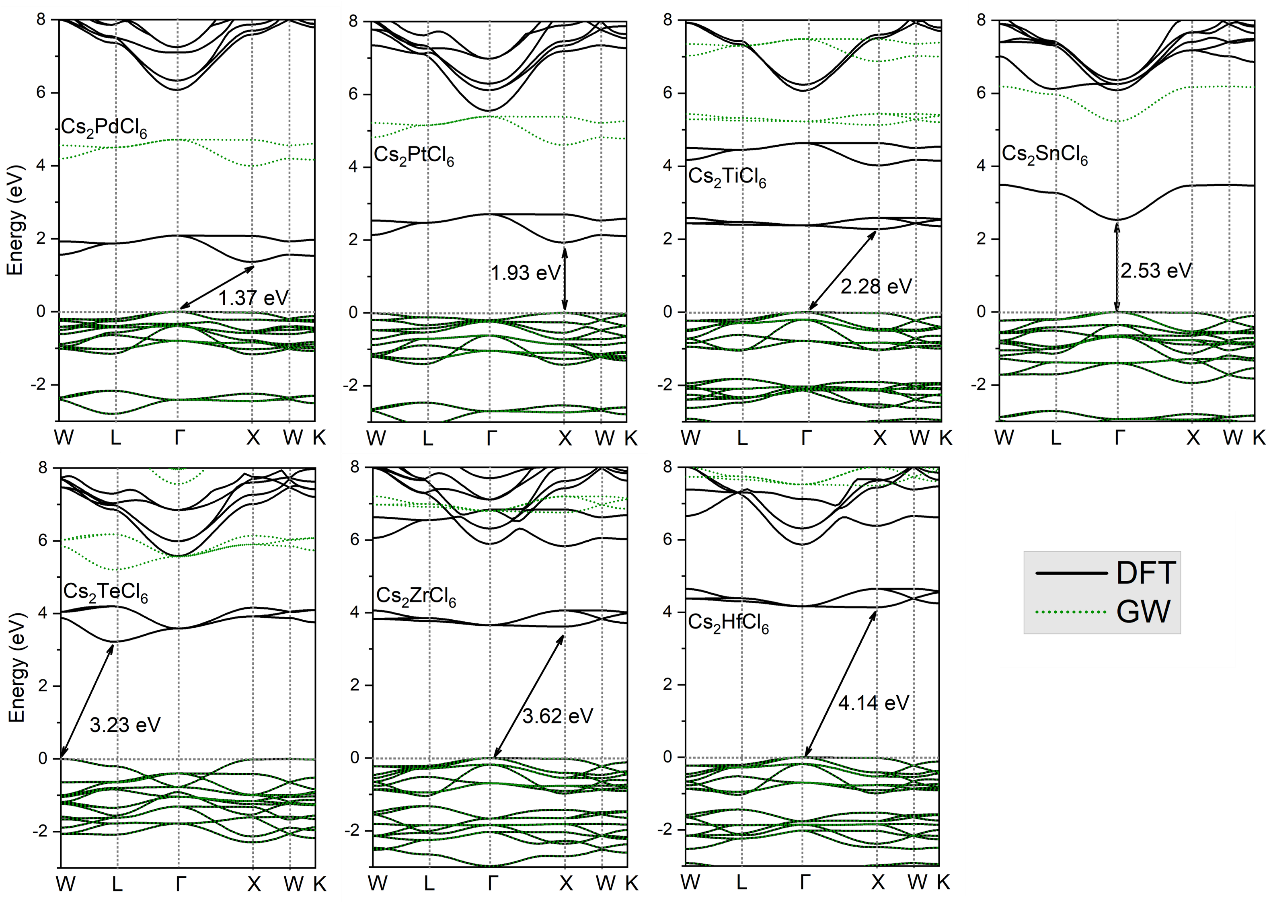


Fig. S3 DFT and GW band structure for Cs2MCl6 (M = Pd, Pt, Ti, Sn, Te, Zr and Hf).


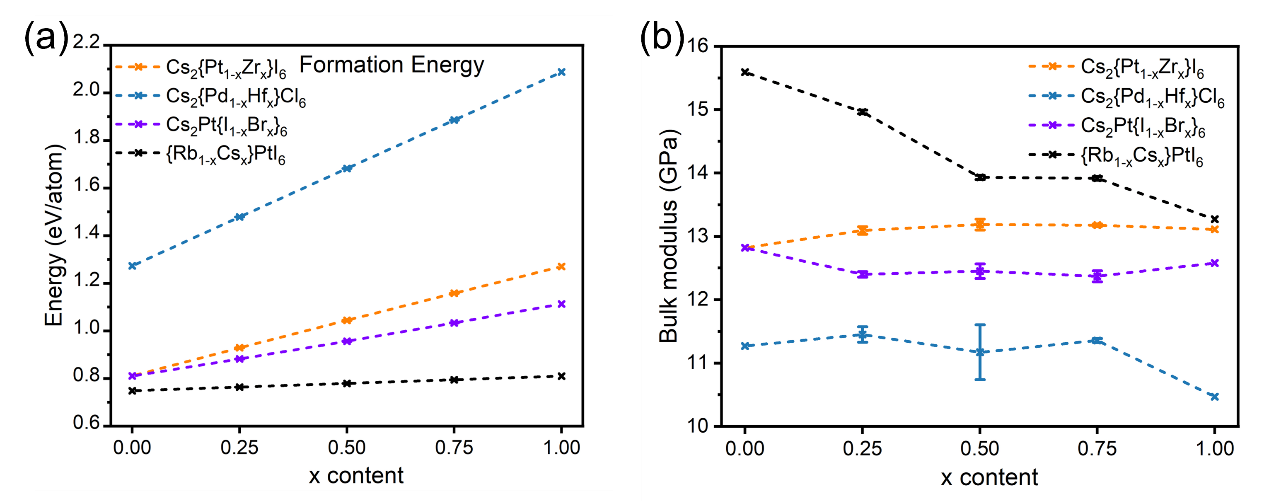


Fig. S4. Effect of different ratios of element doping at A, M and X sites in A2MX6 on the (a) formation energy and (b) bulk modulus.


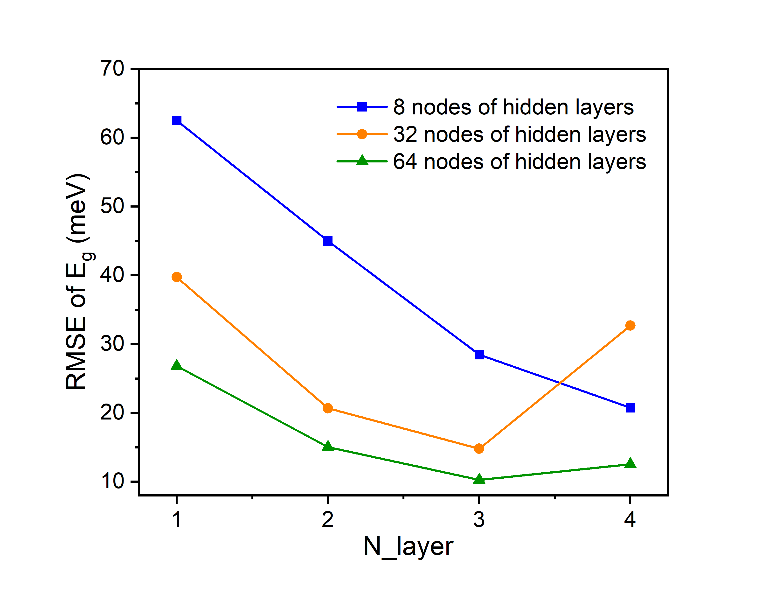


Fig. S5. RMSE of DFT band gap predictions on a 10% subset of the augmented dataset, with different atomic layers and hidden layer nodes in our GNN model.

TABLE S1. Electron (*me*) and hole (*mh*) effective masses in *m0* unit of pure VODPs Cs2MX6.

| Cs2MX6 | Cl | | Br | | I | |
| --- | --- | --- | --- | --- | --- | --- |
|  | *me* (direction) | *mh* (direction) | *me* (direction) | *mh*(direction) | *me* (direction) | *mh* (direction) |
| Pd | 0.94 (X→W)  0.81 (X→Γ) | 3.06 (Γ→L) | 0.38 (X→W)  0.41 (X→Γ) | 1.50 (Γ→L) | 0.35 (X→W) 0.44 (X→Γ) | 1.47 (Γ→L) |
| Pt | 0.56 (X→Γ)  0.71 (X→W) | 3.31 (X→Γ) | 0.41 (X→Γ)  0.43 (X→W) | 1.54 (Γ→L) | 0.36 (X→Γ) 0.29 (X→W) | 1.21 (Γ→L) |
| Ti | 2.34 (X→W) | 2.84 (Γ→L) | 1.02 (X→W) | 1.48 (Γ→L) | 0.77 (X→W) | 1.19 (Γ→L) |
| Sn | 0.59 (Γ→X)  0.59 (Γ→L) | 2.95 (Γ→L) | 0.28 (Γ→X)  0.28 (Γ→L) | 1.55 (Γ→L) | 0.24 (Γ→X) 0.24 (Γ→L) | 1.59 (Γ→L) |
| Te | 0.49 (L→W)  0.88 (L→Γ) | 1.80 (W→L) | 0.53 (L→Γ)  0.28 (L→W) | 1.02 (W→L) | 0.31 (L→Γ) 0.17 (L→W) | 1.02 (Γ→L) |
| Zr | 1.70 (X→W) | 2.94 (Γ→L) | 0.80 (X→W) | 1.55 (Γ→L) | 0.51 (X→W) | 1.03 (Γ→L) |
| Hf | 1.36 (X→W) | 3.18 (Γ→L) | 0.75 (X→W) | 1.55 (Γ→L) | 0.64 (X→W) | 1.29 (Γ→L) |
